# Supplementary material for: Rational design of inducible CRISPR guide RNAs for de novo assembly of transcriptional programs
Source: PubMed Central journal article supplement (PMC5339017; doi:10.1038/ncomms14633), 2017-03-03
Supplement: ncomms14633-s1.pdf [file ncomms14633-s1.pdf]

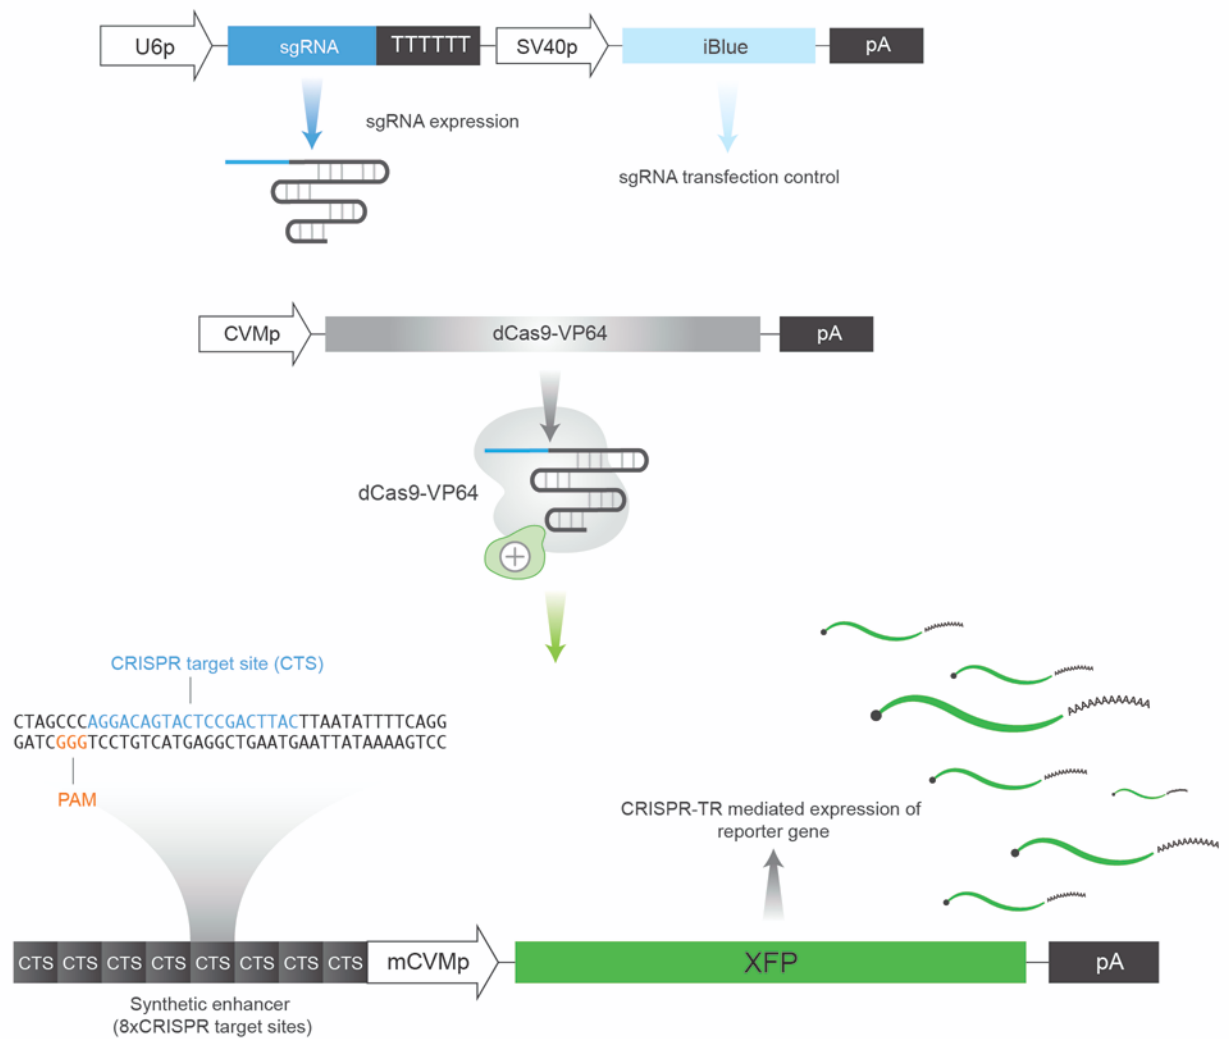

**Supplementary Figure 1. Schematic of CRISPR-TR reporter assay in HEK293-T cells.** A bicistronic vector is used to couple the expression of U6-driven sgRNAs with a fluorescent reporter (iBlue). The dCas9-VP64 gene is expressed under a CMV promoter from a separate plasmid. The assembled sgRNA-dCas9-VP64 complex is targeted to the synthetic enhancer (8 x CRISPR target sites (CTS)) driving the expression of a target gene (XFP), by programming the sgRNA spacer sequence. In this study two sgRNA spacers were programmed (CTS1, CTS2), to drive specific expression (with no detectable cross-talk) of two corresponding reporter target genes (8xCTS1-mCMVp-EYFP-pA and 8xCTS2-mCMVp-ECFP-pA respectively).

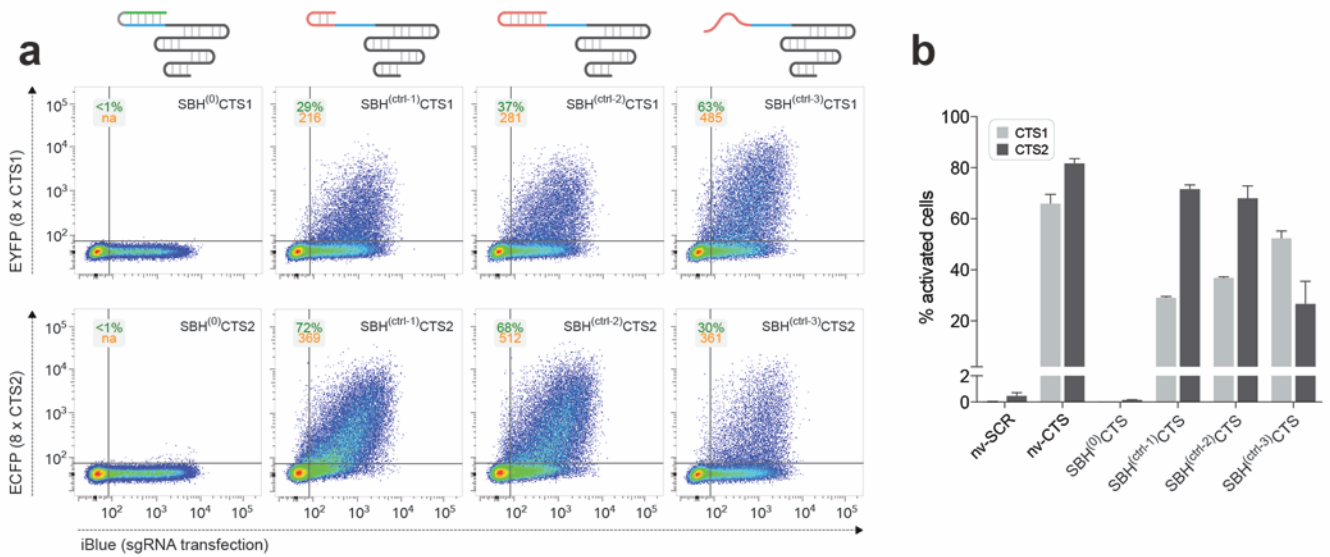

**Supplementary Figure 2. Control SBH-sgRNA mimics.** (a) HEK-293T cells were co-transfected with plasmids containing dCas9-VP64, 8xCTS1-mCMVp-EYFP or 8xCTS2-mCMVp-ECFP reporter, and the following SBH-sgRNAs: i) SBH<sup>(0)</sup>CTS1 and SBH<sup>(0)</sup>CTS2 (silent prototype SBH-sgRNAs with full spacer coverage); ii) SBH<sup>(ctrl-1)</sup>CTS1 and SBH<sup>(ctrl-1)</sup>CTS2 (control SBH-sgRNAs with accessible spacer and offset 5' end 10 bp hairpin structure); iii) SBH<sup>(ctrl-2)</sup>CTS1 and SBH<sup>(ctrl-2)</sup>CTS2 (control SBH-sgRNAs with accessible spacer and offset 5' end 20 bp hairpin structures); SBH<sup>(ctrl-3)</sup>CTS1 and SBH<sup>(ctrl-3)</sup>CTS2 (control SBH-sgRNAs with a scramble back-fold segment). Representative flow cytometry scatter plots (48h post-transfection) show reporter activation (EYFP, ECFP channels) plotted against sgRNA transfection (iBlue channel) for CTS1 and CTS2 spacers. Plots for SBH<sup>(0)</sup>CTS1 and SBH<sup>(ctrl-1)</sup>CTS1 are shared with Fig. 1d. Insets show % of activated cells (double iBlue<sup>+</sup> and EXFP<sup>+</sup>, green) and median reporter fluorescence intensity for this population (orange). (b) Graph represents percentage of activated (EXFP<sup>+</sup>) sgRNA expressing (iBlue<sup>+</sup>) cells for all conditions in (a) and Fig. 1d (n=3, mean +/- s.d.).

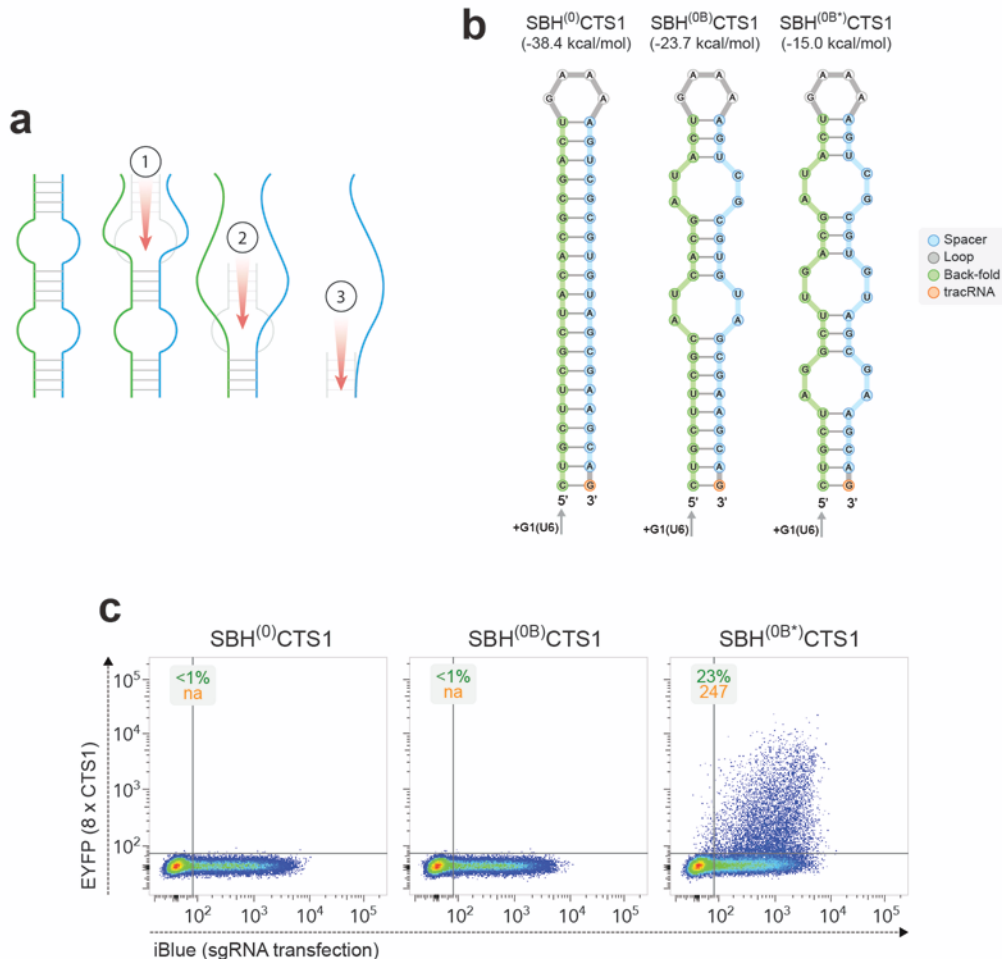

**Supplementary Figure 3. Design of SBHs with reduced thermodynamic stability.** (a) Hypothetical framework showing the low energy stepwise strand separation expected post-cleavage as a consequence of bulge incorporation into the SBH stem architecture. (b) Sequence and RNA secondary structure corresponding to the prototype SBH<sup>(0)</sup>CTS1 design, and alternative architectures containing two (SBH<sup>(0B)</sup>CTS1) and three (SBH<sup>(0B\*)</sup>CTS1) stem bulges. The calculated minimal free energy of each structure is shown in brackets. (c) Representative flow cytometry scatter plots (EYFP reporter fluorescence against iBlue sgRNA transfection) reveals complete CRISPR-TR silencing in both SBH<sup>(0)</sup>CTS1 and SBH<sup>(0B)</sup>CTS1 designs. In contrast, addition of a third bulge renders the sgRNA active, presumably due to excessive destabilisation of the stem structure. Insets show % of activated cells (double iBlue<sup>+ve</sup> and EYFP<sup>+ve</sup>, green) and median reporter fluorescence intensity for this population (orange).

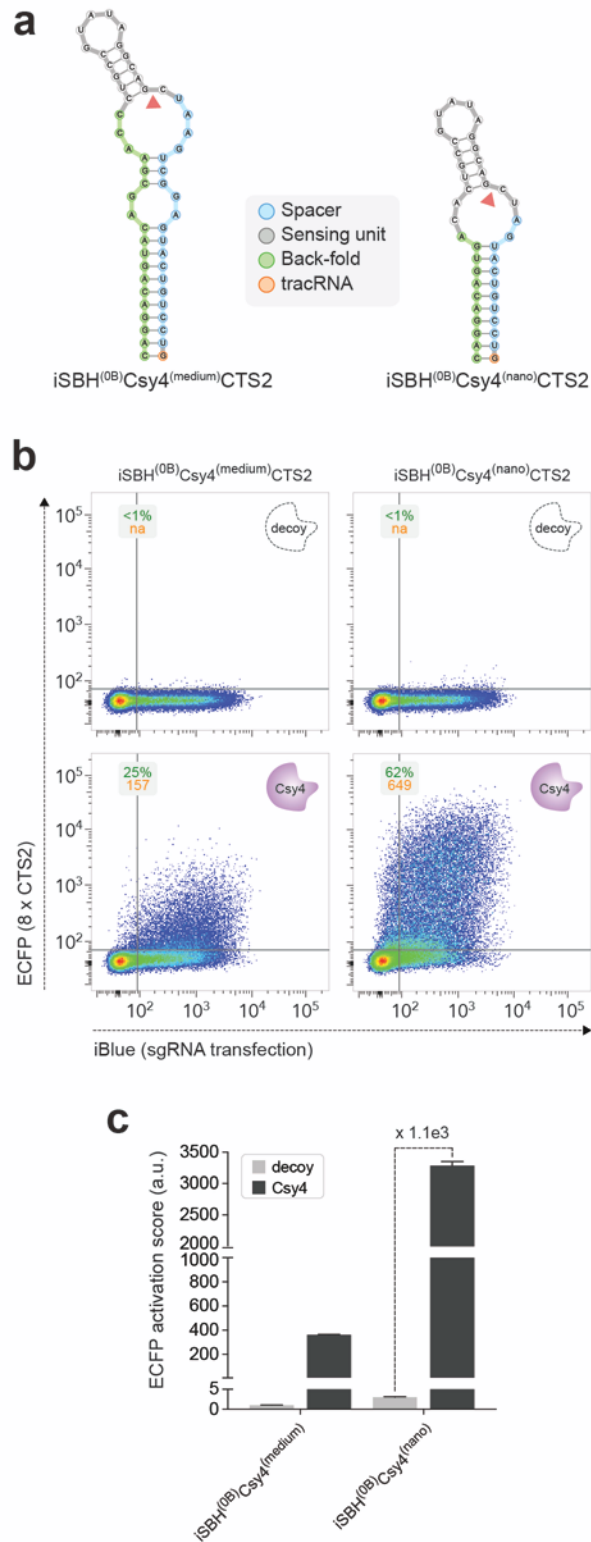

**Supplementary Figure 4. Optimisation of Csy4-responsive iSBH designs for CTS2.** (a) Sequence and RNA secondary structures of SBH<sup>(0B)</sup>Csy4 medium, and nano stem design (red arrow = Csy4 cleavage site) for the CTS2 spacer. (b) Representative CRISPR-TR assay flow cytometry scatter plots for iSBH<sup>(0B)</sup>Csy4<sup>(medium)</sup>CTS2 and iSBH<sup>(0B)</sup>Csy4<sup>(nano)</sup>CTS2 sgRNAs in the absence (OFF-state, top) and presence (ON-state, bottom) of Csy4. Insets show % of activated cells (double iBlue<sup>+</sup> and ECFP<sup>+</sup>, green) and median reporter fluorescence intensity for this population (orange). (c) Quantification of reporter activation using the two iSBH variants in the presence of a decoy plasmid or Csy4 inducer from three biological replicates (n = 3, mean +/- SD, a.u. arbitrary units).

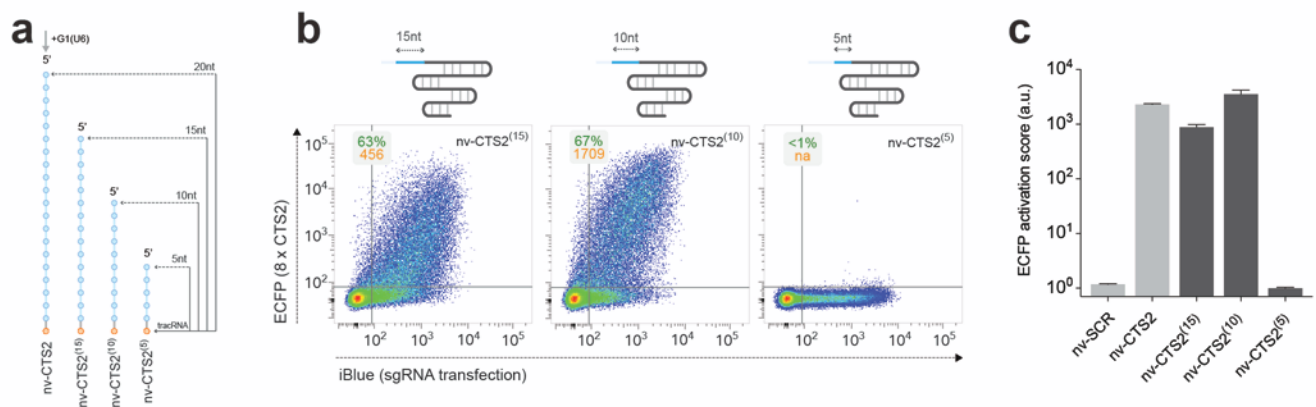

**Supplementary Figure 5. Effect of sgRNA spacer shortening on CRISPR-TR activity.** (a) Progressive shortening (5' to 3') of a native sgRNA spacer length (nv-CTS2 = native 20nt long spacer; nv-CTS2<sup>(15, 10, 5)</sup> = truncated spacers). (b) Representative flow cytometry scatter plots showing the impact of incremental spacer shortening (nv-CTS2<sup>(15, 10, 5)</sup>) on reporter gene activation (axes represent ECFP reporter expression against sgRNA plasmid transfection for the three truncated sgRNA spacers). Insets show % of activated cells (double iBlue<sup>+ve</sup> and ECFP<sup>+ve</sup>, green) and median reporter fluorescence intensity for this population (orange). (c) Quantification of ECFP reporter activation from matched experiments using the following sgRNAs: nv-SCR (control 20nt scramble spacer), nv-CTS2 (matching 20nt spacer), nv-CTS2<sup>(15)</sup> (matching 15nt spacer), nv-CTS2<sup>(10)</sup> (matching 10nt spacer), nv-CTS2<sup>(5)</sup> (matching 5nt spacer) (n = 3, mean +/- s.d., a.u. arbitrary units).

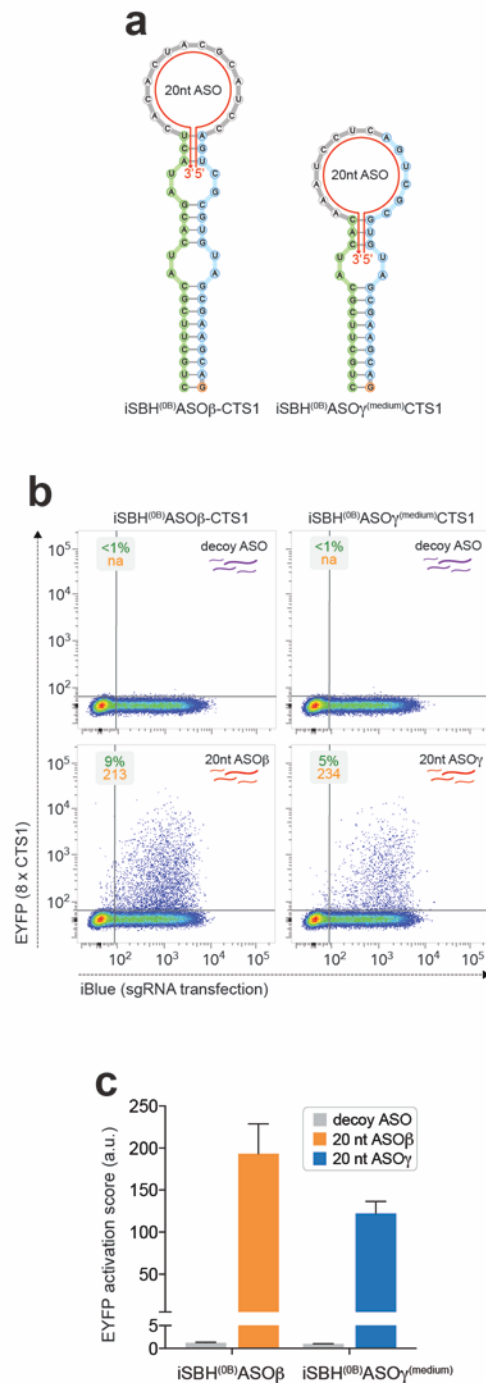

**Supplementary Figure 6. Evaluation of two ASO responsive iSBH designs. (a)** Sequence and RNA secondary structure of ASO-iSBH constructs with different stem length architectures. The iSBH<sup>(0B)</sup>ASO $\beta$ -CTS1 design was generated by replacing the 4nt loop in SBH<sup>(0B)</sup>CTS1 with a 14nt sensing loop complementary to ASO $\beta$ . Extrapolating from the observation that shorter protein-responsive iSBH stems tend to display superior behavior, we also engineered iSBH<sup>(0B)</sup>ASO $\gamma$ (medium)-CTS1 by converting the distal bulge into a 14nt ASO sensing-loop, which incorporates 6 spacer nucleotides and was evolved to enforce an open ssRNA secondary structure. **(b)** Representative flow cytometry scatter plots (EYFP reporter fluorescence against iBlue sgRNA transfection) using the two ASO-responsive iSBH sgRNAs designs, in the presence of a decoy ASO (OFF-state) or active cognate ASO (ON-state). Insets show % of activated cells (double iBlue<sup>+ve</sup> and EYFP<sup>+ve</sup>, green) and median reporter fluorescence intensity for this population (orange). **(c)** Quantification of reporter activation scores for all conditions shown in (b) (n = 3 biological replicates, mean +/- s.d., a.u. arbitrary unit).

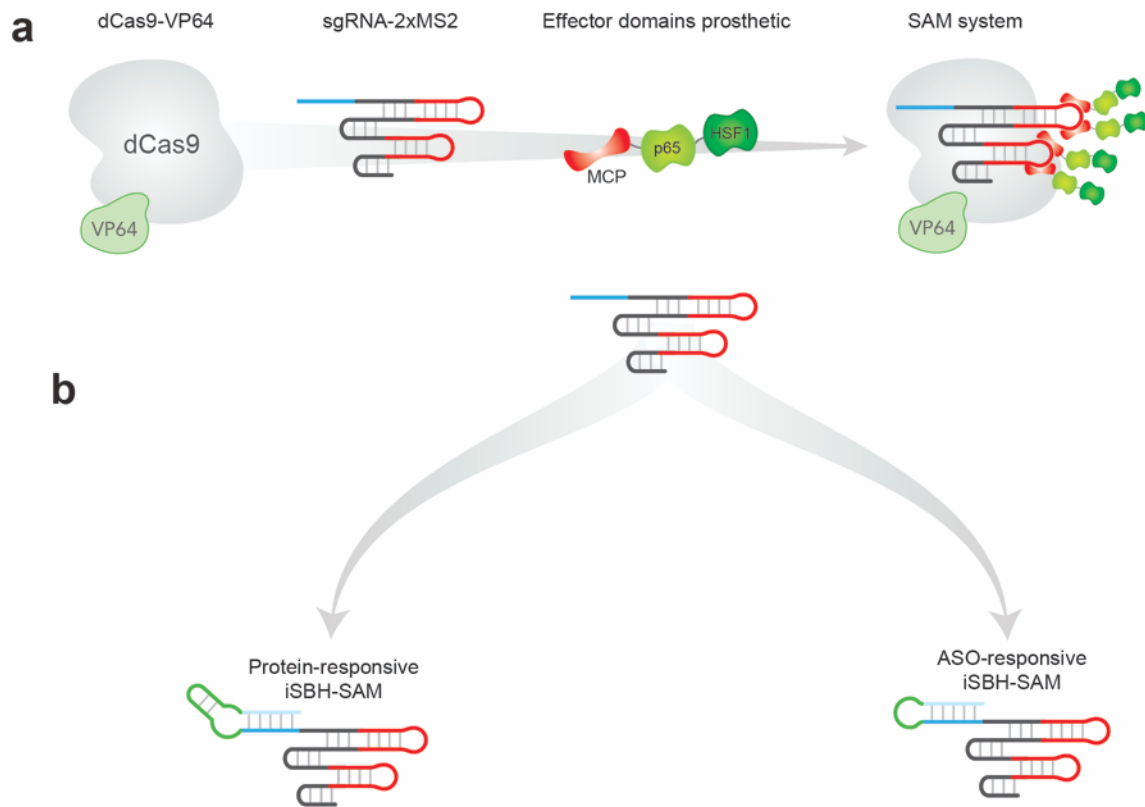

**Supplementary Figure 7. iSBH for SAM-based CRISPR-TR. (a)** Schematic diagram detailing the SAM system for single sgRNA CRISPR-mediated transcriptional activation of endogenous target genes<sup>11</sup>. dCas9-VP4 is complexed with a modified sgRNA-2xMS2 (red hairpins) capable of recruiting additional 4x p65-HSF1 effectors through MS2-MCP interactions. **(b)** Modification of sgRNA-2xMS2 with protein or ASO-responsive iSBH.

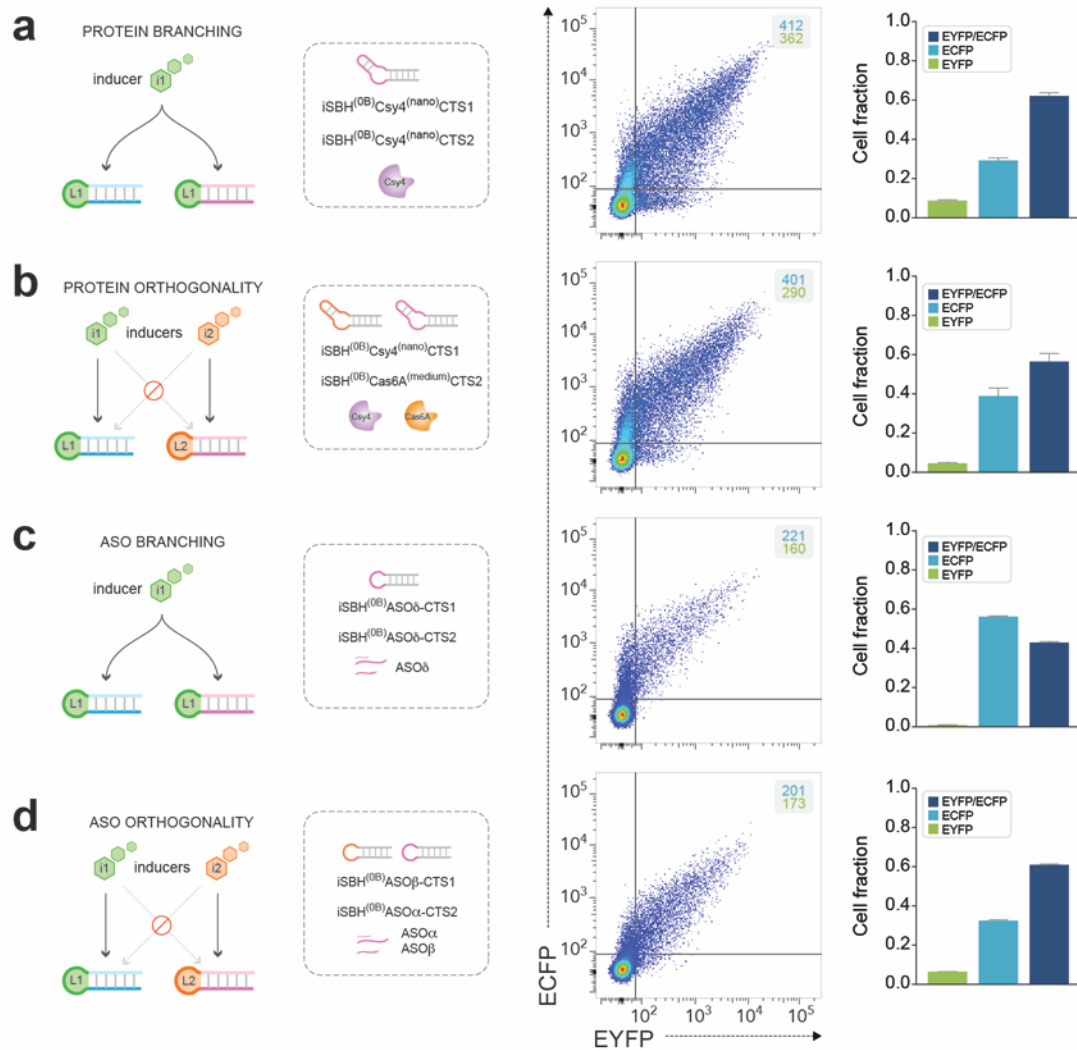

**Supplementary Figure 8. Evaluation of reporter co-activation in single cells. (a-d)** Flow cytometry analysis (48h post-transfection) of cell fractions expressing EYFP and ECFP reporter targets in four gene network module implementations: **(a)** branched activation with single protein inducer (related to Fig. 4b); **(b)** simultaneous orthogonal activation with two protein inducers (related to Fig. 4d); **(c)** branched activation with single ASO inducer (related to Fig. 5b); **(d)** ASO-mediated orthogonal activation of two reporter genes (related to Fig. 5d). Panels show the schematic of each gene module, system components, raw flow cytometry scatter plots and quantification of EYFP<sup>+</sup>, ECFP<sup>+</sup>, and double positive subpopulation frequencies within activated cells ( $n = 3$  biological replicates, mean  $\pm$  s.d.). In all conditions between 40-60% of activated cells co-express both reporter genes. Insets show median reporter fluorescence intensity on the ECFP (light blue) and EYFP (green) channels in the double positive cell population (ECFP<sup>+</sup> and EYFP<sup>+</sup>).



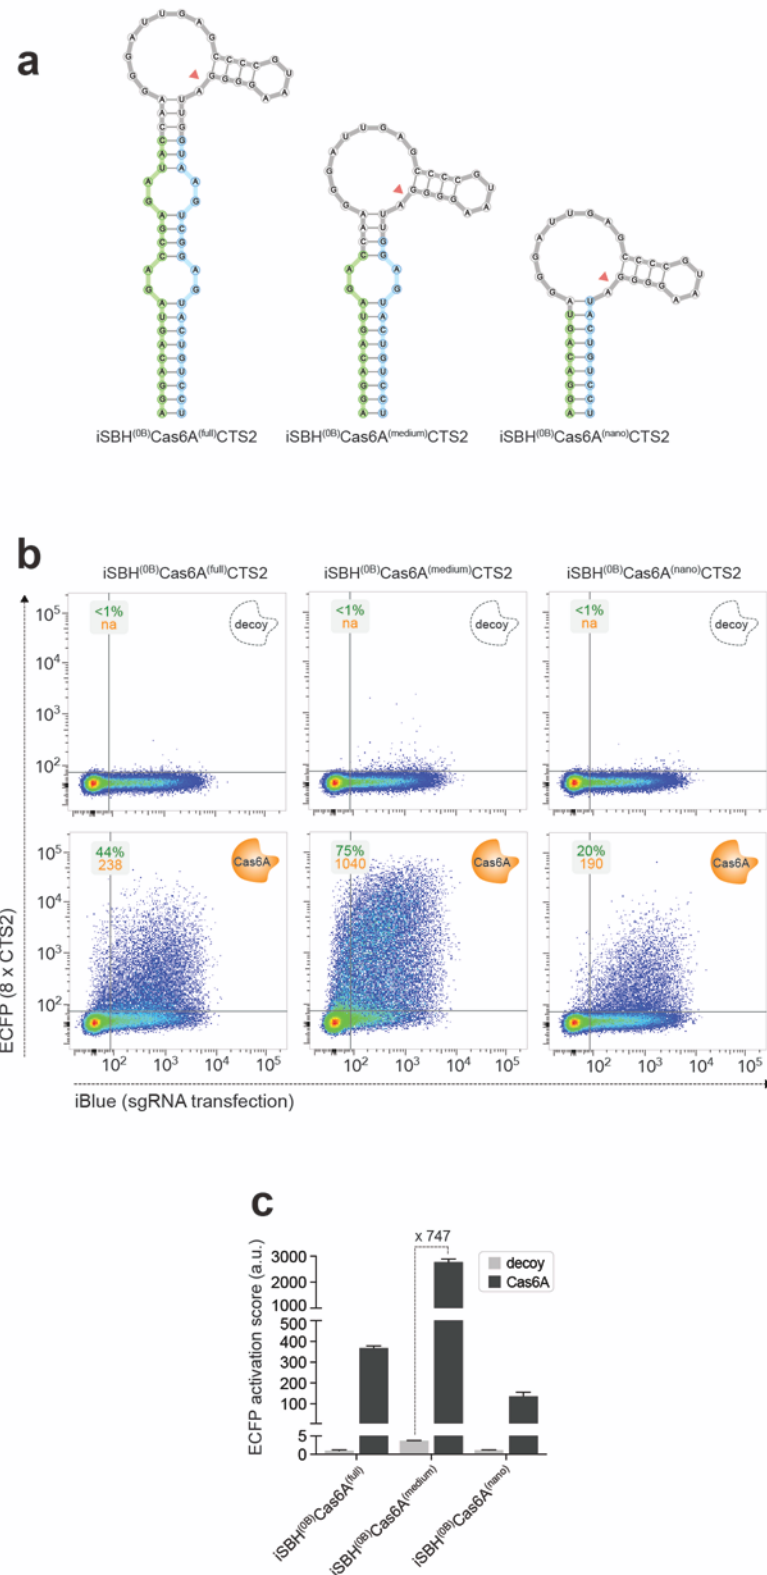

**Supplementary Figure 9. Optimisation of Cas6A-responsive iSBH designs for CTS2 spacer. (a)** Sequence and RNA secondary structures of SBH<sup>(OB)</sup>Cas6A<sup>(full)</sup> sgRNA compared to the *medium*, and *nano* stems (CTS2 spacer; red arrow = Cas6A cleavage site) obtained by grafting the Cas6A RNA box onto the distal or proximal SBH<sup>(OB)</sup>CTS2 bulge. **(b)** Representative CRISPR-TR assay flow cytometry scatter plots for iSBH<sup>(OB)</sup>Cas6A<sup>(full)</sup>CTS2, iSBH<sup>(OB)</sup>Cas6A<sup>(medium)</sup>CTS2 and iSBH<sup>(OB)</sup>Cas6A<sup>(nano)</sup>CTS2 sgRNAs in the absence (OFF-state, top) and presence (ON-state, bottom) of Cas6A. Insets show % of activated cells (double iBlue<sup>+ve</sup> and ECFP<sup>+ve</sup>, green) and median reporter fluorescence intensity for this population (orange). **(c)** Quantification of ECFP reporter activation score using the three iSBH variants in the presence of a decoy plasmid or Cas6A inducer from three biological replicates (n = 3, mean +/- s.d., a.u. arbitrary units).

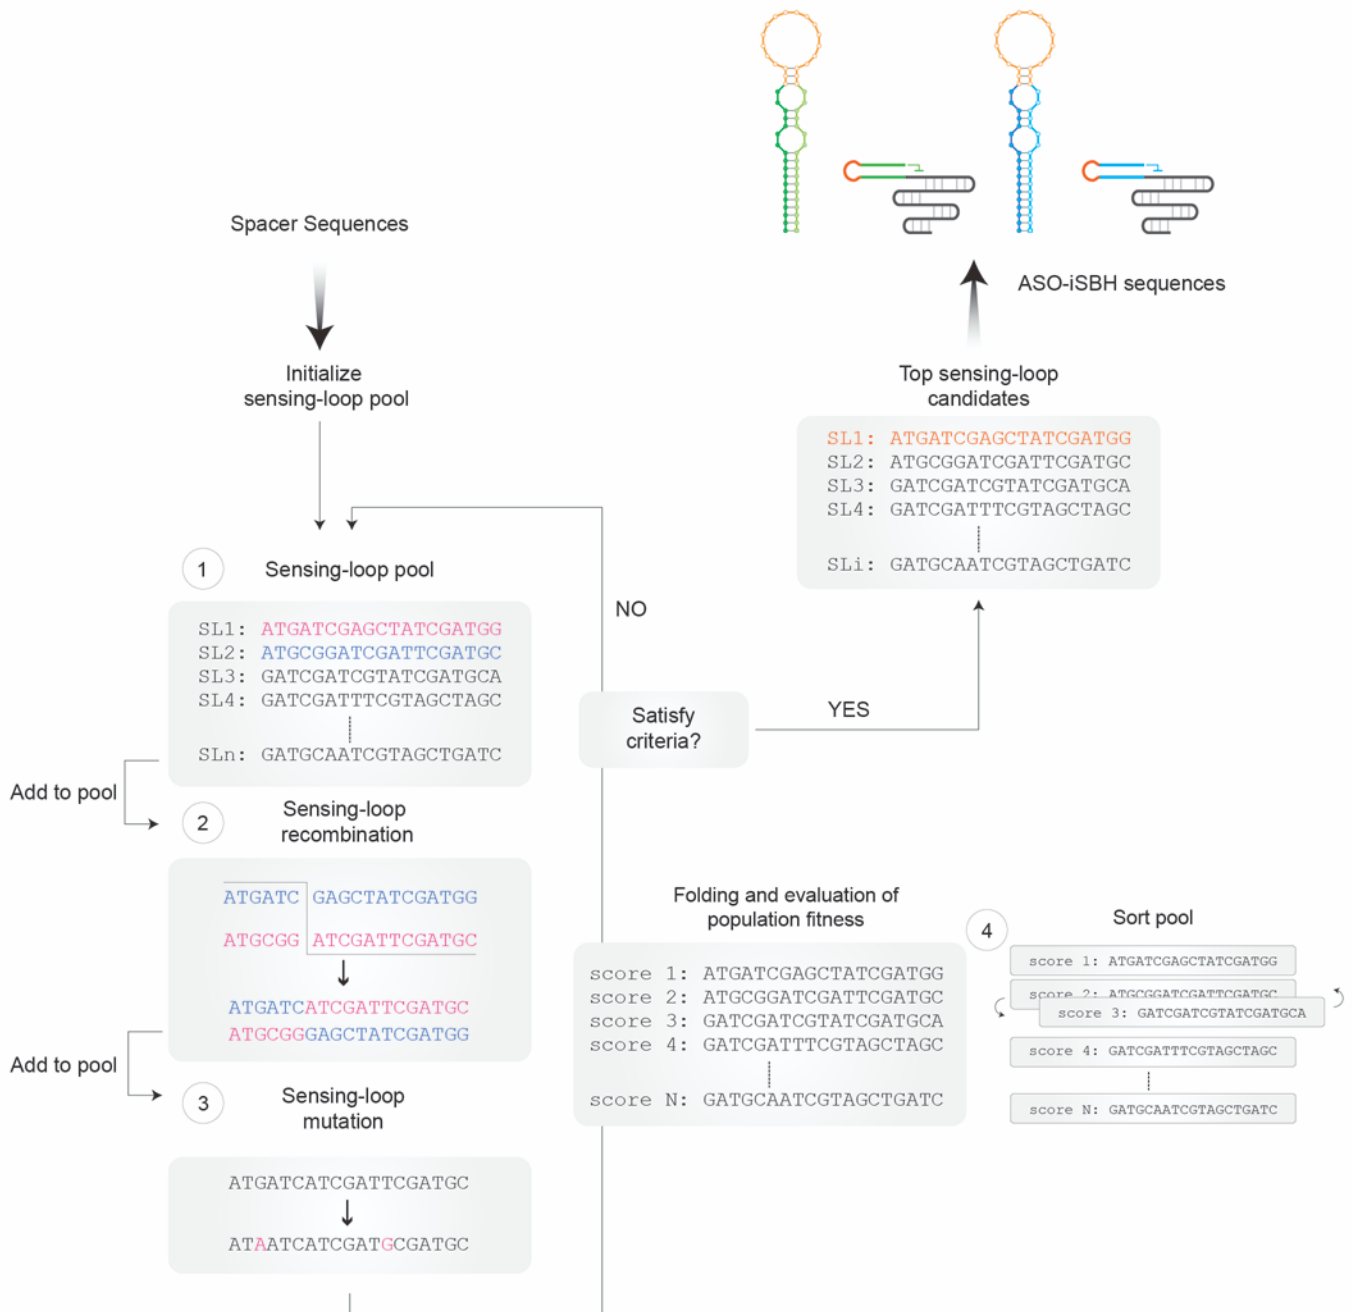

**Supplementary Figure 10. *In silico* evolution of a common ASO sensing-loop satisfying ASO-iSBH folding conditions across multiple spacers using *iSBHfold*.** For an input set of spacers (sp1, sp2, etc.) the algorithm aims to evolve a shared sensing-loop which can be grafted onto all SBH<sup>(OB)</sup>spX while ensuring accessibility to ASO binding by enforcing structural constraints (open ssRNA loop conformation). Loops satisfying these conditions are evolved from an initial pool of 20nt RNA sequences [1]. A custom-made genetic algorithm is then run iteratively on this pool over several generations to optimise the sensing-loop sequences. For each iteration the following steps are performed: i) initial sequences are recombined to generate offspring sequences which are added to the original parent population [2]; ii) the pool is further enriched with sequences obtained by randomly mutating the existing segments as well as new fully randomised ones [3]. iii) finally, each sequence is folded within the corresponding iSBH using NUPACK<sup>21</sup> and attributed a folding score (FS<sub>i</sub>) measuring the similarity between the predicted RNA secondary structure and that of the target ASO-iSBH [4]. The ensuing pool is then sorted and only the fittest sequences are considered for the next iteration (repeat steps [1] to [4]). Once a user-defined criteria based on score or number of iterations is reached, the system outputs a list of top sensing-loop candidates used to create the ASO-responsive iSBHs.

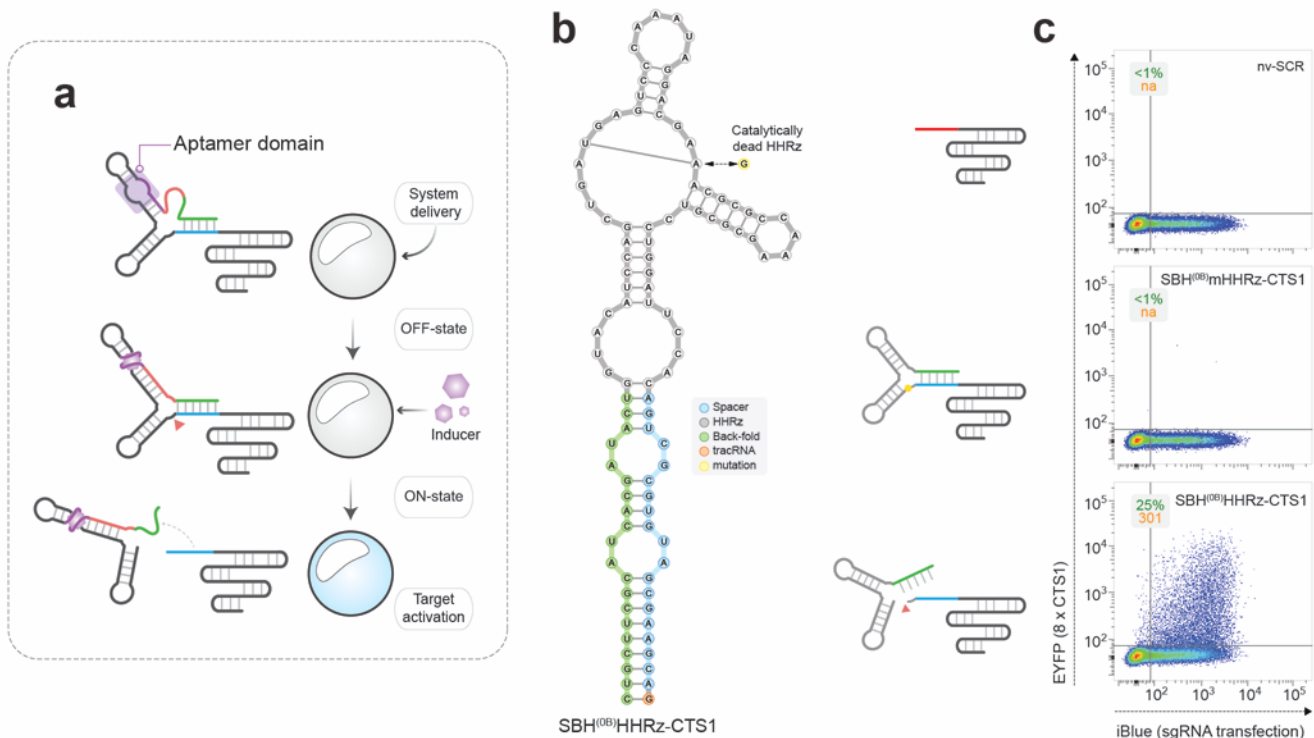

**Supplementary Figure 11. HHRz-based iSBH spacer release mechanism. (a)** Theoretical framework underlying the use of allosteric hammerhead ribozymes (aHHRz) for iSBH-sgRNA-based CRISPR-TR conditional control of gene expression. An iSBH equipped with an engineered aHHRz containing a ligand-sensing aptamer domain is delivered to cells. In the absence of a cognate ligand (OFF-state) the aHHRz assumes an inactive conformation, sequestering the spacer and inhibiting CRISPR-TR. Delivery of the cognate ligand promotes a change in conformation (strand displacement), which allows the aHHRz to resume its catalytic activity. aHHRz cleavage facilitates back-fold dissociation from the spacer, rendering the sgRNA competent for CRISPR-TR-mediated activation of its programmed target gene (ON-state). **(b)** Sequence and RNA secondary structure of a prototype HHRz-SBH. The active HHRz is directly fused to the SBH<sup>(0B)</sup>CTS1. A to G point mutation (yellow) renders the HHRz inactive (mHHRz). **(c)** Representative CRISPR-TR assay flow cytometry scatter plots with nv-SCR, SBH<sup>(0B)</sup>HHRz-CTS1, and SBH<sup>(0B)</sup>mHHRz-CTS1 sgRNAs (EYFP reporter fluorescence against iBlue sgRNA transfection). Insets show % of activated cells (double iBlue<sup>+ve</sup> and EYFP<sup>+ve</sup>, green) and median reporter fluorescence intensity for this population (orange).

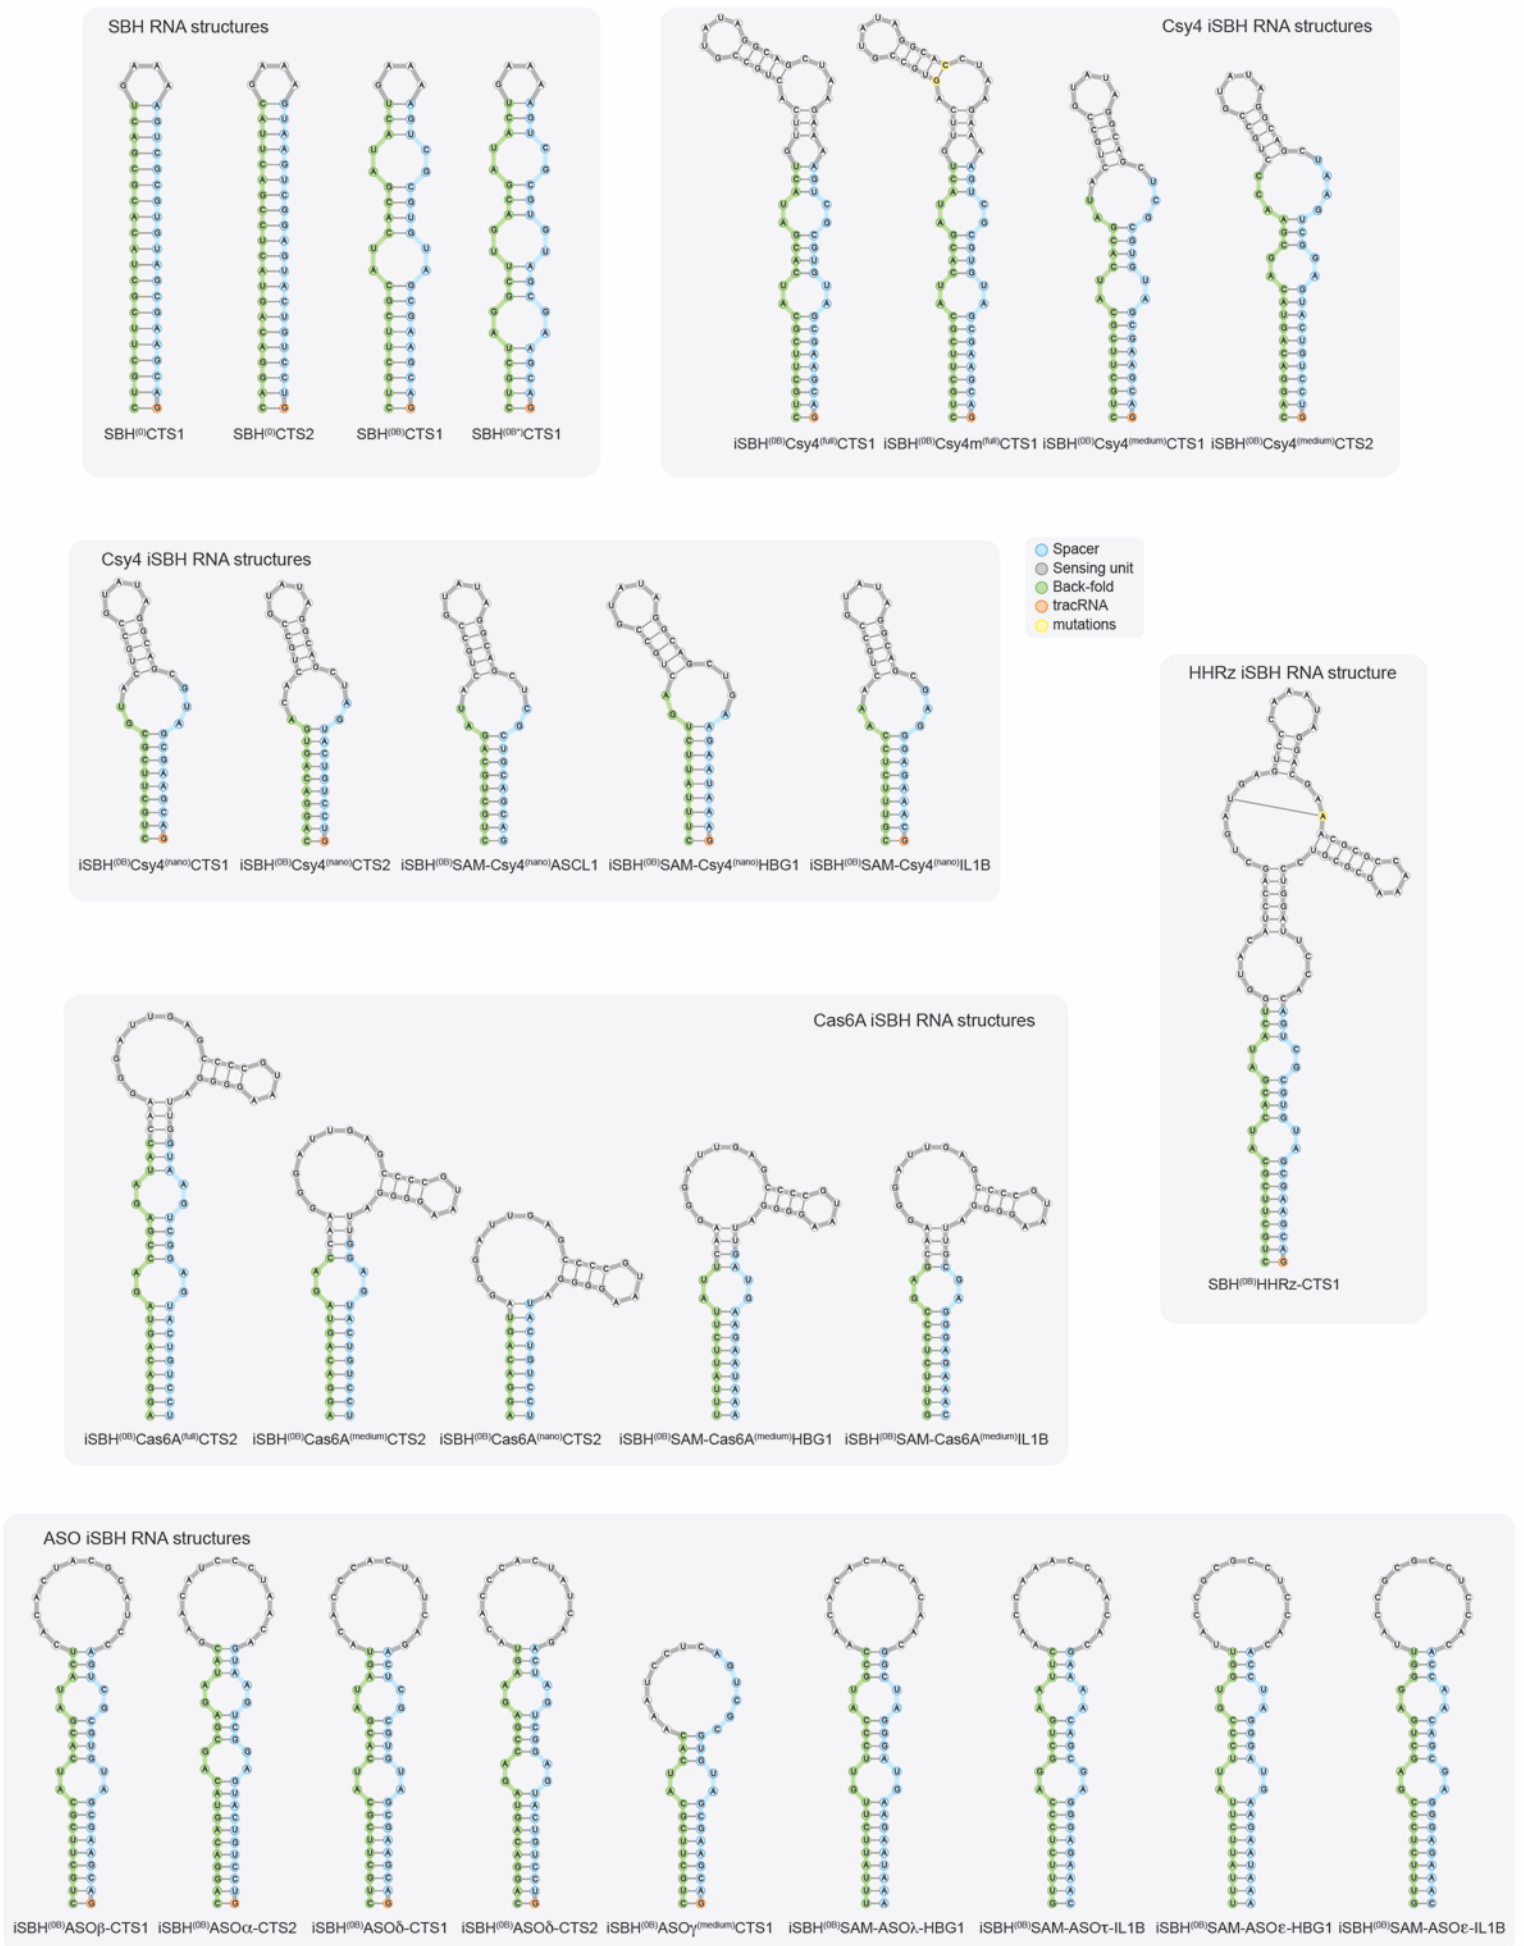

**Supplementary Figure 12.** Catalogue of silent (SBH) and and inducible (iSBH) designs used in the study organised by inducer and target type.

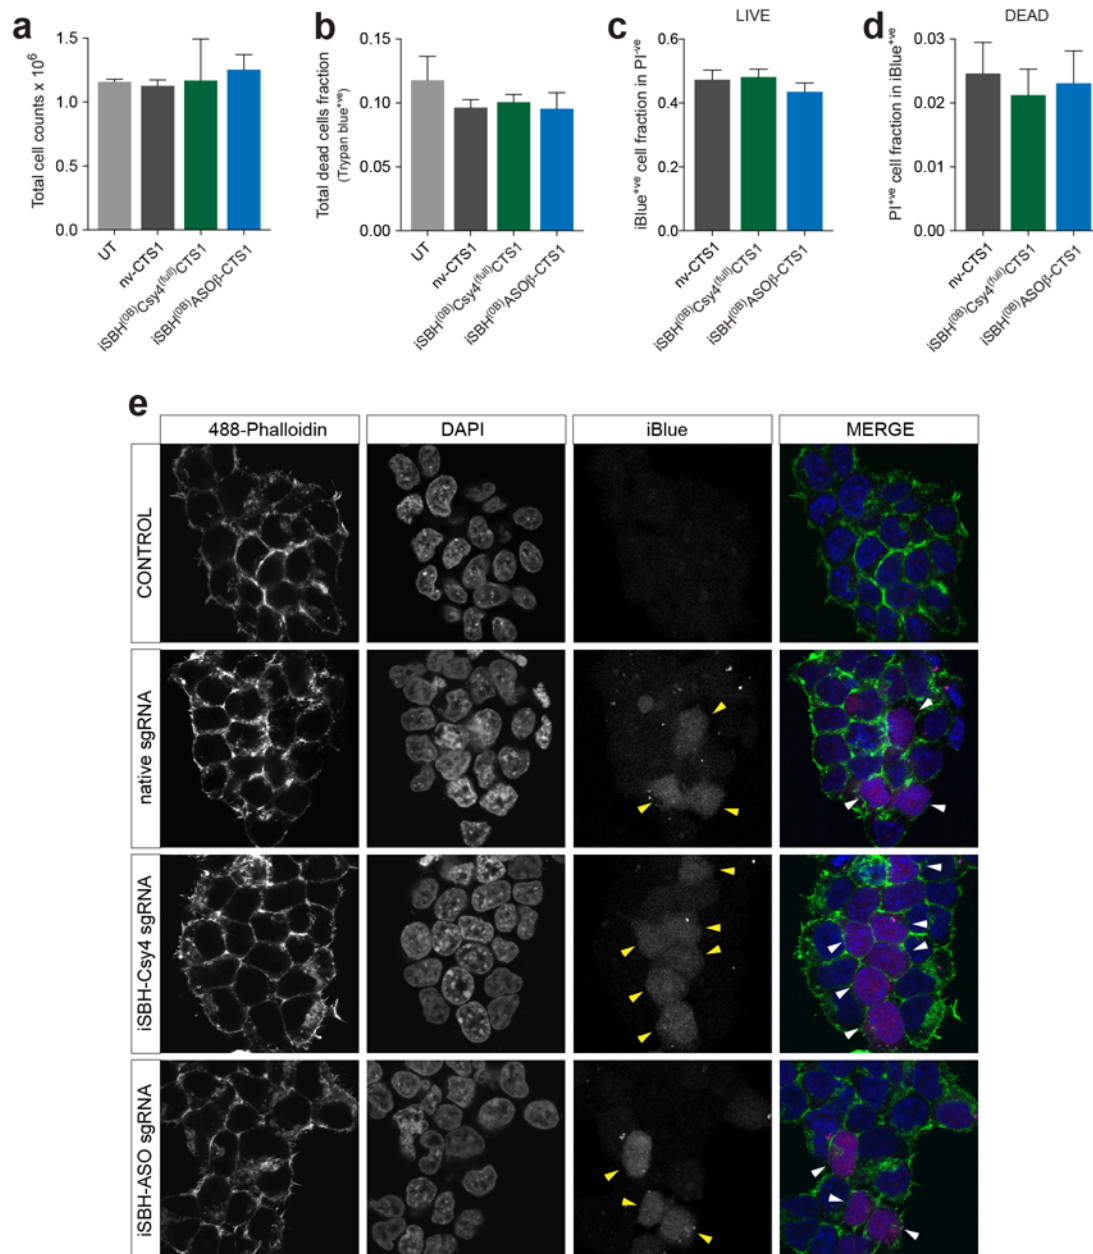

**Supplementary Figure 13. Analysis of cellular toxicity and stress following delivery of sgRNA variants.** HEK293-T cells were transfected with either a native sgRNA (nv-CTS1; NV), Csy4-responsive iSBH-sgRNA (iSBH<sup>(OB)</sup>Csy4<sup>(nano)</sup>CTS1; Csy4-SBH), or ASO-responsive iSBH-sgRNA (iSBH<sup>(OB)</sup>ASO $\beta$ -CTS1; ASO-SBH). Untransfected control cells were treated with PEI in the absence of plasmid DNA (UT). Cells were harvested 48h post-transfection, counted (hemocytometer) and stained with Propidium iodide (PI) before flow cytometry analysis. **(a)** Total cell counts for UT, NV, Csy4-SBH and ASO-SBH conditions. **(b)** Fraction of total dead cells measured by Trypan Blue staining. **(c)** Flow cytometry quantification of sgRNA expressing cell fraction (iBlue+ve) amongst live cells (PI-ve). **(d)** Flow cytometry quantification of dead cell fraction (PI+ve) amongst cells expressing sgRNAs (iBlue+ve). **(e)** Confocal microscopy analysis of cellular morphology (488-Phalloidin, green) and nuclear integrity (DAPI, blue) in UT cells compared to cells transfected with nv-CTS1, iSBH<sup>(OB)</sup>Csy4<sup>(nano)</sup>CTS1 and iSBH<sup>(OB)</sup>ASO $\beta$ -CTS1 sgRNA variants (iBlue, magenta).

**U6-sgRNA-6xT cassette (U6 promoter, scramble spacer segment with 2x BbsI sites, sgRNA scaffold, terminator)**

GAGGGCCTATTTCCCATGATTCCTTCATATTTGCATATACGATACAAGGCTGTTAGAGAGATAAATTGGAATT  
AATTTGACTGTAAACACAAAGATATTAGTACAAAATACGTGACGTAGAAAGTAATAATTTCTTGGGTAGTTT  
GCAGTTTTAAAATTATGTTTTAAAATGGACTATCATATGCTTACCGTAACTTGAAAGTATTTGATTTCTTG  
GCTTTATATATCTTGTGAAAGGACGAAACACCGGGTCTTCGAGAAGACCTGTTTTAGAGCTAGAAATAGCA  
AGTTAAAATAAGGCTAGTCCGTTATCAACTTGAAAAAGTGGCACCGAGTCGGTGCTTTTTTT

**Human codon optimized Cas6A (Kozak sequence, 5' NLS, TTCas6A)**

GCCACCATGGCCCCAAGAAGAAGCGGAAGGTTCGGTATCCACGGAGTCCCAGCAGCCGAAAACCTG  
TACTTCCAATCCAATGCAGCTAGCGTGCTTGCCGCGCTTGTGCTCGTGTGGAAAGGGGAAGGCCTC  
CCGGAGCCGTTGGGTCTTAGGGGTTTTCTTTACGGCCTTTTGC GCGAGGTAGCGCCAGAGGTACAC  
GATCAAGGAGAAAATCCTTTTGCTCTGGGATTCGGCGGGAGGGAAGGCGCAGCTTGGGCTAGGGTT  
AGTCTTCTCGTAGAAGGGTTGTATGCGCGACTCGCACCTAGACTCTATGCGCTTGAAGGTGAGGAA  
GTTTCGCTTGGACCTCCGTTCCGGGTACGCGCAGTCTTGCAAGAGGGCCATCCTTGGGCTGGAGTT  
TCAACGTATCCACGCTTGTTCAGGGACCTCCCTCCAGAGATCTGGCCCTCCGATTTGCAAGTCCA  
ACCTTCTTCCGCCGAAAGGCGTTCCTACTACCCCGTGCCGGAACCTCGCCTGGTTCTGGAGTCCCTC  
CTGCGGCGGTTGGAAGCATTCGGTCCACTTAAAGCCCCGGAAGGAGTGAGAGAAGCTCTTCTGGAG  
AGAACCACGGTTCGATCATTTGGAGGGACGCACACTTCGGCGAGGACGGAAGTTGACACAGCTGGA  
TTTGTAGGCAGGGTTCGTGTACCACCTGCCTAGAGCGACAGAGGAAGAAGCACTCTGGTTGTCTGCG  
TTGGGCCGATTCGCGTTCATTTCAGGAGTAGGTGCAAAGACCAGCTTGGGATATGGTAGAGCACGA  
GCAGAATCTGCGTAG

**Supplementary Figure 14.** DNA sequences of U6-sgRNA-6xT cassette and the human codon optimized Cas6A.

| Oligo/Primer name        | Sequence (5'-3')                                         |
|--------------------------|----------------------------------------------------------|
| Fwd_sgRNA-cassette_SpeI  | TAGACTAGTGAGGGCCTATTTCCCATG                              |
| Rev_sgRNA-cassette_BcoDI | CTAGTCTCTGCTAGCAAAAAGCACCGACTCGG                         |
| Fwd_SV40_NcoI            | CTAGCCTAACTCGCCCAGTTCC                                   |
| Rev_SV40                 | GATCAGATCCGAAAATGGATATAC                                 |
| Fwd_iBlue                | GTATATCCATTTTCGGATCTGATCGCCACCATGTCGGTACC                |
| Rev_iBlue_BsrGI          | CTACTATGTACATCATTGGACTGAGACTGTGC                         |
| HHRz_oligo_1             | TAGGAAGACTACACCGCTGCTTCGCTACACGCGACTGGTACA               |
| HHRz_oligo_2             | CGCGTTTCGTCCTATTTGGGACTCATCAGCTGGATGTACCAGTCGCGTGTAG     |
| HHRz_oligo_2m            | CGCGTCTCGTCCTATTTGGGACTCATCAGCTGGATGTACCAGTCGCGTGTAG     |
| HHRz_oligo_3             | CCAAATAGGACGAAACGCGCCAAAGCGCGTCTGGATTCCACAGTCGCGTG       |
| HHRz_oligo_3m            | CCAAATAGGACGAGACGCGCCAAAGCGCGTCTGGATTCCACAGTCGCGTG       |
| HHRz_oligo_4             | CTAGAAGACTAAAACGCTTCGCTACACGCGACTGTGGAATCC               |
| HHRz_oligo_flanking_fwd  | TAGGAAGACTACACCGCTGC                                     |
| HHRz_oligo_flanking_rev  | CTAGAAGACTAAAACGCTTCGCT                                  |
| Fwd_pX330-NLS            | GACCTGCATCCCAAGCTTACGCGTGCCACCATGGCCCCAAAGAAGAAGCG       |
| Rev_pX330-NLS            | GGTCGCTAGCTGCATTGGATTGGAAGTACAGGTTTTTCGGCTGCTGGGACTCCGTG |

**Supplementary Table 1.** Cloning oligonucleotides and PCR primers used in the study.

| NAME                      | Plasmid backbone                   | Insert (5' overhang CACC, 3' overhang GTTT)                                                           |
|---------------------------|------------------------------------|-------------------------------------------------------------------------------------------------------|
| nv-SCR                    | pcDNA3.1_U6-sgRNA-6T_SV40-iBlue-pA | GGGTCTTCGAGAAGACCT                                                                                    |
| nv-CTS1                   | pcDNA3.1_U6-sgRNA-6T_SV40-iBlue-pA | GAGTCGCGTGTAGCGAAGCA                                                                                  |
| nv-CTS2                   | pcDNA3.1_U6-sgRNA-6T_SV40-iBlue-pA | GTAAGTCGGGACTGTCTCT                                                                                   |
| SBH(0)CTS1                | pcDNA3.1_U6-sgRNA-6T_SV40-iBlue-pA | GCTGCTTCGCTACACGCGACTGAAAAGTCGCGTGTAGCGAAGCA                                                          |
| SBH(0)CTS2                | pcDNA3.1_U6-sgRNA-6T_SV40-iBlue-pA | GCAGGACAGTACTCCGACTACGAAAGTAAGTCGGAGTACTGTCTCT                                                        |
| SBH(ctrl-1)CTS1           | pcDNA3.1_U6-sgRNA-6T_SV40-iBlue-pA | GAAAGCAGCCGAAAGGCTGCTTTCAGTCGCGTGTAGCGAAGCA                                                           |
| SBH(ctrl-1)CTS2           | pcDNA3.1_U6-sgRNA-6T_SV40-iBlue-pA | GACAAGCAGCCGAAAGGCTGCTTTCAGTCGCGTGTAGCGAAGCA                                                          |
| SBH(ctrl-2)CTS1           | pcDNA3.1_U6-sgRNA-6T_SV40-iBlue-pA | GCAGGACAGTACTCCGACTACGAAAGTAAGTCGGAGTACTGTCTCT                                                        |
| SBH(ctrl-2)CTS2           | pcDNA3.1_U6-sgRNA-6T_SV40-iBlue-pA | GCTGCTTCGCTACACGCGACTGAAAAGTCGCGTGTAGCGAAGCAAGGTAAGTCGGAGTACTGTCTCT                                   |
| SBH(ctrl-3)CTS1           | pcDNA3.1_U6-sgRNA-6T_SV40-iBlue-pA | GTAGCGATCAGTAGTCAGAATGAAAAGTCGCGTGTAGCGAAGCA                                                          |
| SBH(ctrl-3)CTS2           | pcDNA3.1_U6-sgRNA-6T_SV40-iBlue-pA | GACGTAGAGTTAGTTAGCTAGAGAAAGTAAGTCGGAGTACTGTCTCT                                                       |
| SBH(5)CTS1                | pcDNA3.1_U6-sgRNA-6T_SV40-iBlue-pA | CGGCTACACGCGACTGAAAAGTCGCGTGTAGCGAAGCA                                                                |
| SBH(5)CTS2                | pcDNA3.1_U6-sgRNA-6T_SV40-iBlue-pA | GAGTACTCCGACTACGAAAGTAAGTCGGAGTACTGTCTCT                                                              |
| SBH(10)CTS1               | pcDNA3.1_U6-sgRNA-6T_SV40-iBlue-pA | GCACGCGACTGAAAAGTCGCGTGTAGCGAAGCA                                                                     |
| SBH(10)CTS2               | pcDNA3.1_U6-sgRNA-6T_SV40-iBlue-pA | GTCCGACTTACGAAAGTAAGTCGGAGTACTGTCTCT                                                                  |
| SBH(15)CTS1               | pcDNA3.1_U6-sgRNA-6T_SV40-iBlue-pA | GGACTGAAAAGTCGCGTGTAGCGAAGCA                                                                          |
| SBH(15)CTS2               | pcDNA3.1_U6-sgRNA-6T_SV40-iBlue-pA | GCTTACGAAAGTAAGTCGGAGTACTGTCTCT                                                                       |
| wt-CTS1(5)                | pcDNA3.1_U6-sgRNA-6T_SV40-iBlue-pA | GAAGCA                                                                                                |
| wt-CTS2(5)                | pcDNA3.1_U6-sgRNA-6T_SV40-iBlue-pA | GTCTCT                                                                                                |
| wt-CTS1(10)               | pcDNA3.1_U6-sgRNA-6T_SV40-iBlue-pA | GTAGCGAAGCA                                                                                           |
| wt-CTS2(10)               | pcDNA3.1_U6-sgRNA-6T_SV40-iBlue-pA | GTAAGTCGCGTGTAGCGAAGCA                                                                                |
| wt-CTS1(15)               | pcDNA3.1_U6-sgRNA-6T_SV40-iBlue-pA | CGGTGTAGCGAAGCA                                                                                       |
| wt-CTS2(15)               | pcDNA3.1_U6-sgRNA-6T_SV40-iBlue-pA | GTCGGAGTACTGTCTCT                                                                                     |
| SBH(0B)CTS1               | pcDNA3.1_U6-sgRNA-6T_SV40-iBlue-pA | GCTGCTTCGCATCAGGATACTGAAAAGTCGCGTGTAGCGAAGCA                                                          |
| SBH(03x)CTS1              | pcDNA3.1_U6-sgRNA-6T_SV40-iBlue-pA | GCTGCTAGGCTTGACGATACTGAAAAGTCGCGTGTAGCGAAGCA                                                          |
| iSBH(0B)Csy4(full)CTS1    | pcDNA3.1_U6-sgRNA-6T_SV40-iBlue-pA | GCTGCTTCGCATCAGGATACTGTTCACTGCGGTATAGGCAGCTAAGAAAAGTCGCGTGTAGCGAAGCA                                  |
| iSBH(0B)Csy4(full)CTS1    | pcDNA3.1_U6-sgRNA-6T_SV40-iBlue-pA | GCTGCTTCGCATCAGGATACTGTTCACTGCGGTATAGGCAGCTAAGAAAAGTCGCGTGTAGCGAAGCA                                  |
| iSBH(0B)Csy4(medium)CTS   | pcDNA3.1_U6-sgRNA-6T_SV40-iBlue-pA | GCTGCTTCGCATCAGGATACTGTTCACTGCGGTATAGGCAGCTAAGAAAAGTCGCGTGTAGCGAAGCA                                  |
| iSBH(0B)Csy4(medium)CTS   | pcDNA3.1_U6-sgRNA-6T_SV40-iBlue-pA | GCAGGACAGTACAGCAACCTGCCGTATAGGCAGCTAAGTCGGAGTACTGTCTCT                                                |
| iSBH(0B)Csy4(nano)CTS1    | pcDNA3.1_U6-sgRNA-6T_SV40-iBlue-pA | GCTGCTTCGCGTACTGCCGTATAGGCAGCTAGCGAAGCA                                                               |
| iSBH(0B)Csy4(nano)CTS2    | pcDNA3.1_U6-sgRNA-6T_SV40-iBlue-pA | GCAGGACAGTACAGCTGCCGTATAGGCAGCTAGTACTGTCTCT                                                           |
| SAM_nv-SCR                | SAM_U6-sgRNA-2xMS2                 | GGGTCTTCGAGAAGACCT                                                                                    |
| SAM_nv-HBG1               | SAM_U6-sgRNA-2xMS2                 | GGCTAGGGATGAAGAATAAA                                                                                  |
| SAM_nv-IL1B               | SAM_U6-sgRNA-2xMS2                 | GAAAACAGCGAGGGAGAAAC                                                                                  |
| iSBH(0B)Csy4(nano)ASCL1   | SAM_U6-sgRNA-2xMS2                 | GCTGCTGCAGTACTGCCGTATAGGCAGCTCGCTGCAGCAG                                                              |
| iSBH(0B)Csy4(nano)HBG1    | SAM_U6-sgRNA-2xMS2                 | GCTTTATTCTGACTGCCGTATAGGCAGCTGAAGAATAAA                                                               |
| iSBH(0B)Csy4(nano)IL1B    | SAM_U6-sgRNA-2xMS2                 | CGGTTCTCCAACTGCCGTATAGGCAGCGAGGGAGAAAC                                                                |
| iSBH(0B)Cas6A(full)CTS2   | pcDNA3.1_U6-sgRNA-6T_SV40-iBlue-pA | GAGGACAGTAGACCGAGATACCAAGGATTGAGCCCCGTAAGGGGATTGGTAAGTCGGAGTACTGTCTCT                                 |
| iSBH(0B)Cas6A(medium)CTS  | pcDNA3.1_U6-sgRNA-6T_SV40-iBlue-pA | GAGGACAGTAGACCAAGGATTGAGCCCCGTAAGGGGATTGGAGTACTGTCTCT                                                 |
| iSBH(0B)Cas6A(nano)CTS2   | pcDNA3.1_U6-sgRNA-6T_SV40-iBlue-pA | GAGGACAGTAGGGATTGAGCCCCGTAAGGGGATTGAGTACTGTCTCT                                                       |
| iSBH(0B)Cas6A(medium)HBG1 | SAM_U6-sgRNA-2xMS2                 | GTTTATTCTTATTCAAGGGATTGAGCCCCGTAAGGGGATTGATGAAGAATAAA                                                 |
| iSBH(0B)Cas6A(medium)IL1B | SAM_U6-sgRNA-2xMS2                 | GTTTCTCCGAGCAAGGGATTGAGCCCCGTAAGGGGATTGCGAGGGAGAAAC                                                   |
| iSBH(0B)ASO1-CTS1         | pcDNA3.1_U6-sgRNA-6T_SV40-iBlue-pA | GCTGCTTCGCATCAGGATACTCACACTACGCATCCAGTCCGCGTGTAGCGAAGCA                                               |
| iSBH(0B)ASO2-CTS2         | pcDNA3.1_U6-sgRNA-6T_SV40-iBlue-pA | GCAGGACAGTACAGCGAGATACGAACATCCCTAACAGTAAGTCGGAGTACTGTCTCT                                             |
| iSBH(0B)ASO-CTS1          | pcDNA3.1_U6-sgRNA-6T_SV40-iBlue-pA | GCTGCTTCGCATCAGGATACTCACACTACGCATCCAGTCCGCGTGTAGCGAAGCA                                               |
| iSBH(0B)ASO-CTS2          | pcDNA3.1_U6-sgRNA-6T_SV40-iBlue-pA | GCAGGACAGTAGACCGAAGTACACCCACTATCAGACTAGTCGGAGTACTGTCTCT                                               |
| iSBH(0B)ASO1(medium)CTS   | pcDNA3.1_U6-sgRNA-6T_SV40-iBlue-pA | GCTGCTTCGCATCACAATCCTCAGTCGCGTGTAGCGAAGCA                                                             |
| iSBH(0B)ASO1-HBG1         | SAM_U6-sgRNA-2xMS2                 | GTTTATTCTTGTCCCATGCCAACACACACACACAGCGCTAGGGATGAAGAATAAA                                               |
| iSBH(0B)ASO2-IL1B         | SAM_U6-sgRNA-2xMS2                 | GGTTCTCCGAGCTGAATCAACCAACACACAGCAAAACGCGAGGGAGAAAC                                                    |
| iSBH(0B)ASO-HBG1          | SAM_U6-sgRNA-2xMS2                 | GTTTATTCTTATTCCGCTGTTACCGCGCTCCACACTAGGGATGAAGAATAAA                                                  |
| iSBH(0B)ASO-IL1B          | SAM_U6-sgRNA-2xMS2                 | GGTTCTCCGAGCTGAGGGTACCAGCGCTCCACACCAACAGCGAGGGAGAAAC                                                  |
| SBH(0B)HHRz-CTS1          | SAM_U6-sgRNA-2xMS2                 | GCTGCTTCGCATCAGGATACTGGTACATCCAGCTGATGAGTCCCAAAAGGACGAAACGCGCAAAAGCGCTCTGGATTCCACAGTCCGCGTGTAGCGAAGCA |
| SBH(0B)mHHRz-CTS1         | SAM_U6-sgRNA-2xMS2                 | GCTGCTTCGCATCAGGATACTGGTACATCCAGCTGATGAGTCCCAAAAGGACGAGACGCGCAAAAGCGCTCTGGATTCCACAGTCCGCGTGTAGCGAAGCA |

Supplementary Table 2. Sequence of native sgRNA spacer and SBH / iSBH hairpins used in the study together with the corresponding cloning vectors.



| NAME              | Sequence                           | Corresponding ASO-iSBH                                     |
|-------------------|------------------------------------|------------------------------------------------------------|
| ASO $\alpha$ -14  | T*G*T*TAGGGATGT*T*C*G              | iSBH <sup>(OB)</sup> ASO $\alpha$ -CTS2                    |
| ASO $\alpha$ -255 | T*A*C*T*GTTAGGGATGTTTCGTAT*C*T*C*G | iSBH <sup>(OB)</sup> ASO $\alpha$ -CTS2                    |
| ASO $\beta$       | A*C*T*G*GATGCGTAGTGT*G*A*G*T       | iSBH <sup>(OB)</sup> ASO $\beta$ -CTS1                     |
| ASO $\gamma$      | C*A*C*G*CGACTGAGGATT*T*G*T*G       | iSBH <sup>(OB)</sup> ASO $\gamma$ <sup>(medium)</sup> CTS1 |
| ASO $\alpha$      | T*A*C*T*GTTAGGGATGTT*C*G*T*A       | iSBH <sup>(OB)</sup> ASO $\alpha$ -CTS2                    |
| ASO $\delta$      | A*G*T*C*TGATAGTGGGTG*T*A*C*T       | iSBH <sup>(OB)</sup> ASO $\delta$ -CTS1                    |
|                   |                                    | iSBH <sup>(OB)</sup> ASO $\delta$ -CTS2                    |
| ASO $\lambda$     | G*C*C*G*TTGTGTGTGTGT*T*G*G*C       | iSBH <sup>(OB)</sup> ASO $\lambda$ -HBG1                   |
| ASO $\tau$        | T*T*C*G*TGTTGGTTTGGT*T*G*A*A       | iSBH <sup>(OB)</sup> ASO $\tau$ -IL1B                      |
| ASO $\epsilon$    | G*G*T*G*TGGAGGCGCGGT*A*A*C*C       | iSBH <sup>(OB)</sup> ASO $\epsilon$ -HBG1                  |
|                   |                                    | iSBH <sup>(OB)</sup> ASO $\epsilon$ -IL1B                  |

**Supplementary Table 3.** ASO sequences used in the study.

| <b>Target mRNA</b> | <b>Forward Primer Sequence (5'-3')</b> | <b>Reverse Primer Sequence (5'-3')</b> |
|--------------------|----------------------------------------|----------------------------------------|
| GAPDH              | AACAGCGACACCCACTCCTC                   | CATACCAGGAAATGAGCTTGACAA               |
| dCas9-VP64 (SAM)   | AACCTATGCCACCTGTTTCG                   | ATCCAGGATTGTCTTGCCGG                   |
| HBG1               | GTTGTCTACCCATGGACCCA                   | TCTCCAAGGAAGTCAGCAC                    |
| IL1B               | CGAATCTCCGACCACCACTA                   | AGGAAAGAAGGTGCTCAGG                    |

**Supplementary Table 4.** RT-qPCR primers used in the study.
